# Supplementary material for: Downregulation of FXYD2 Is Associated with Poor Prognosis and Increased Regulatory T Cell Infiltration in Clear Cell Renal Cell Carcinoma
Source: Hindawi journal article supplement (doi:10.1155/2022/4946197), 2022-10-19

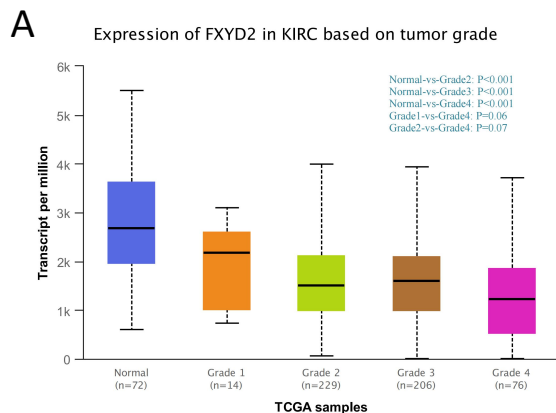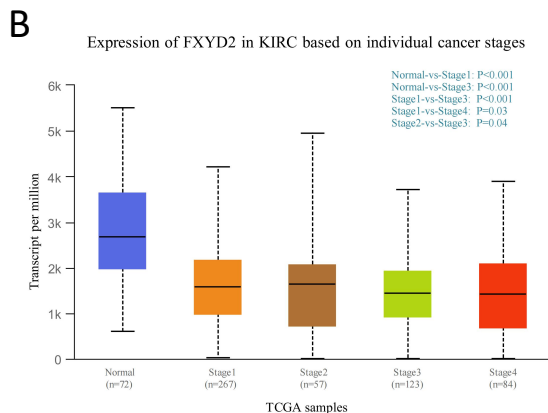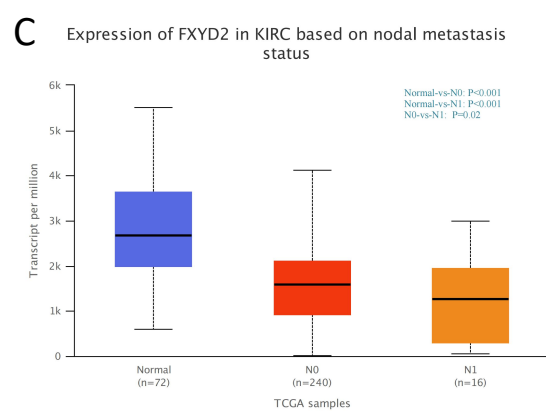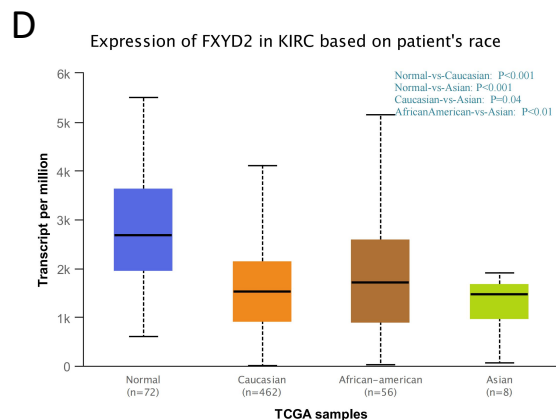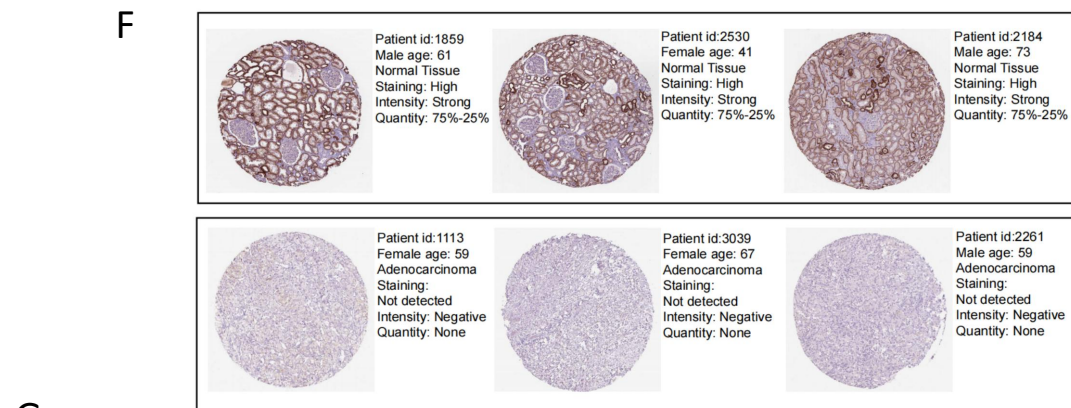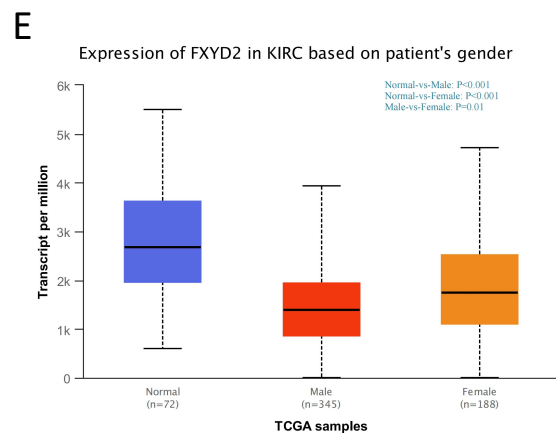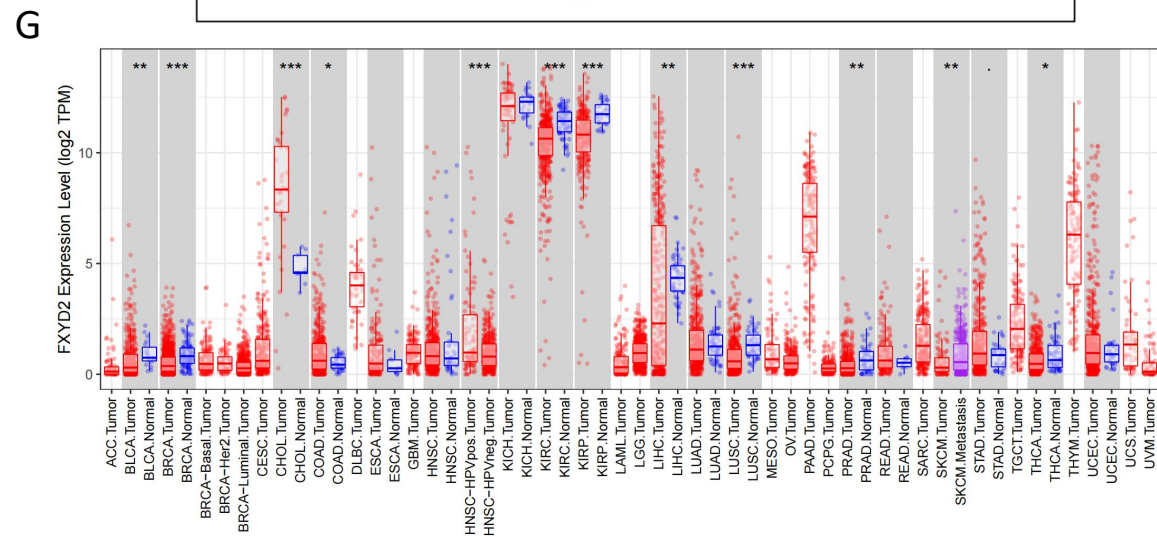

Supplement: f1 [file 4946197.f1.pdf]
