# Supplementary material for: Downregulation of FXYD2 Is Associated with Poor Prognosis and Increased Regulatory T Cell Infiltration in Clear Cell Renal Cell Carcinoma
Source: Hindawi journal article supplement (doi:10.1155/2022/4946197), 2022-10-19
Supplement: f3 [file 4946197.f3.pdf]

**A**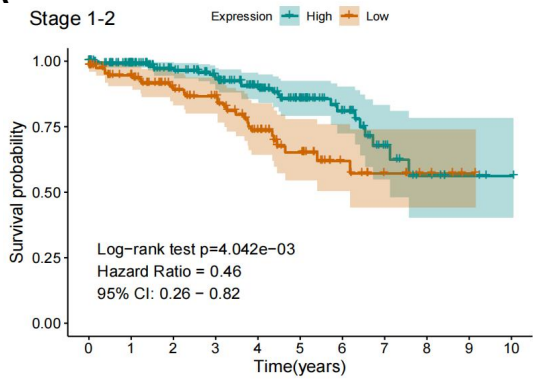

Expression High Low

|     |     |     |     |    |    |    |    |   |   |   |
|-----|-----|-----|-----|----|----|----|----|---|---|---|
| 207 | 173 | 138 | 116 | 85 | 55 | 33 | 15 | 7 | 3 | 1 |
| 117 | 97  | 74  | 64  | 44 | 28 | 13 | 7  | 4 | 1 | 0 |

Time(years)

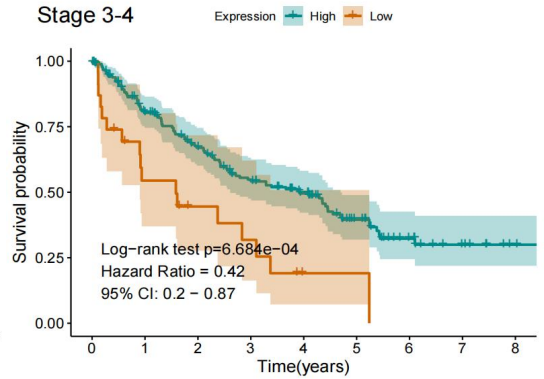

Expression High Low

|     |     |     |    |    |    |    |   |   |
|-----|-----|-----|----|----|----|----|---|---|
| 183 | 133 | 103 | 78 | 60 | 32 | 16 | 8 | 2 |
| 23  | 11  | 7   | 5  | 1  | 1  | 0  | 0 | 0 |

Time(years)

**B**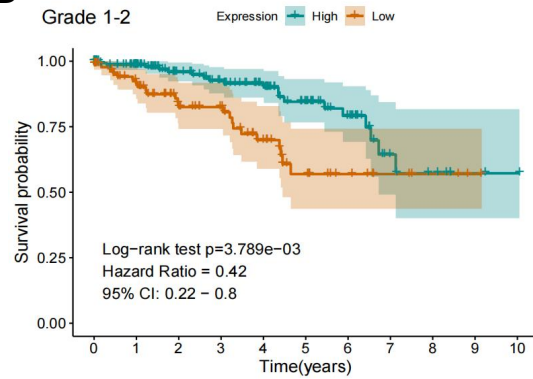

Expression High Low

|     |     |    |    |    |    |    |   |   |   |   |
|-----|-----|----|----|----|----|----|---|---|---|---|
| 150 | 124 | 94 | 79 | 62 | 41 | 26 | 9 | 6 | 2 | 1 |
| 91  | 70  | 50 | 43 | 27 | 15 | 9  | 5 | 3 | 1 | 0 |

Time(years)

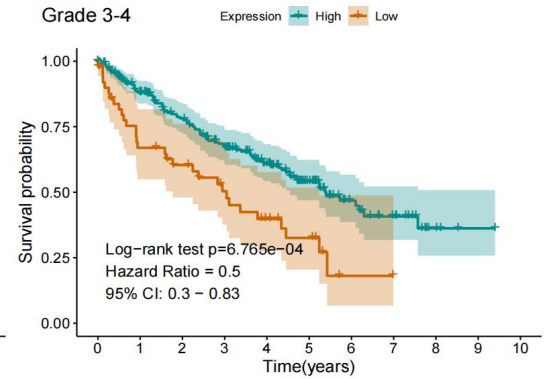

Expression High Low

|     |     |     |     |    |    |    |    |   |   |   |
|-----|-----|-----|-----|----|----|----|----|---|---|---|
| 232 | 183 | 148 | 118 | 86 | 49 | 24 | 15 | 4 | 1 | 0 |
| 51  | 32  | 26  | 19  | 13 | 9  | 1  | 0  | 0 | 0 | 0 |

Time(years)

**C**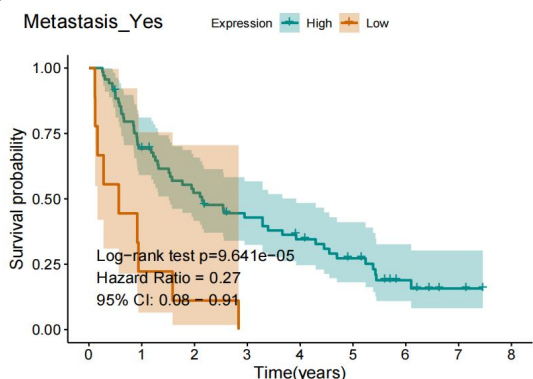

Expression High Low

|    |    |    |    |    |    |   |   |   |
|----|----|----|----|----|----|---|---|---|
| 69 | 47 | 34 | 26 | 20 | 14 | 6 | 2 | 0 |
| 9  | 2  | 1  | 0  | 0  | 0  | 0 | 0 | 0 |

Time(years)

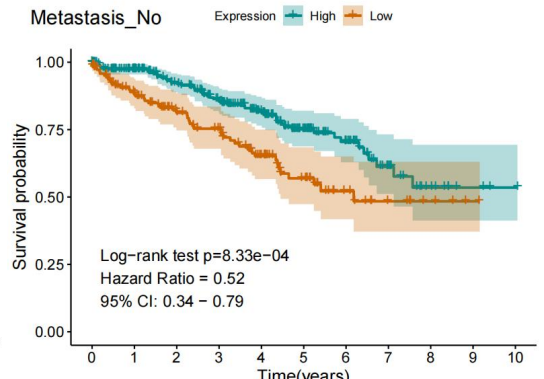

Expression High Low

|     |     |     |     |     |    |    |    |   |   |   |
|-----|-----|-----|-----|-----|----|----|----|---|---|---|
| 274 | 235 | 195 | 163 | 119 | 69 | 41 | 20 | 9 | 3 | 1 |
| 146 | 111 | 85  | 71  | 48  | 31 | 15 | 8  | 4 | 1 | 0 |

Time(years)
